# Supplementary material for: miR200-regulated CXCL12β promotes fibroblast heterogeneity and immunosuppression in ovarian cancers
Source: PubMed Central journal article supplement (PMC5849633; doi:10.1038/s41467-018-03348-z), 2018-03-13
Supplement: 41467_2018_3348_MOESM3_ESM.pdf [file 41467_2018_3348_MOESM3_ESM.pdf]

## **Description of Additional Supplementary Files**

### **File Name: Supplementary Data 1**

**Description:** CAF-S1 gene signature. List of genes specifically up-regulated (adjusted P value  $\leq 0.05$ ) in CAF-S1 fibroblasts isolated from fresh HGSOC samples.

### **File Name: Supplementary Data 2**

**Description:** CAF-S4 gene signature. List of genes specifically up-regulated (adjusted P value  $\leq 0.05$ ) in CAF-S4 fibroblasts isolated from fresh HGSOC samples.
